# Supplementary material for: Zr4+-doped sodium manganese oxide: enhanced electrochemical performance as a cathode in sodium ion batteries
Source: Royal Society of Chemistry journal article supplement (doi:10.1039/d4dt02894e), 2024-12-05
Supplement: d4dt02894e1.pdf [file d4dt02894e1.pdf]

## Supporting Information

### Zr<sup>4+</sup> doped sodium manganese oxide: Enhanced electrochemical performance as cathode in sodium ion battery

Bristisnata Kashyap<sup>a,b</sup>, Dimple P. Dutta<sup>a,b\*</sup>, B. Modak,<sup>a,b</sup> Sanjay Kumar,<sup>c</sup> Balaji R. Ravuri<sup>d</sup>

**Table S1** Cell parameters of undoped and Zr doped NMO sample obtained from the Rietveld refinement of the XRD data.

|                      | Undoped NMO      |                  | Zr doped NMO     |                  |
|----------------------|------------------|------------------|------------------|------------------|
| Space group          | F <sub>ddd</sub> | P <sub>mmm</sub> | F <sub>ddd</sub> | P <sub>mmm</sub> |
| a (Å)                | 5.710(1)         | 2.856(2)         | 5.720(2)         | 2.855(4)         |
| b (Å)                | 9.421(2)         | 6.336(3)         | 9.451(1)         | 6.337(1)         |
| c (Å)                | 19.691(1)        | 4.788(2)         | 19.681(3)        | 4.787(1)         |
| $\alpha$ (°)         | 90.0000          | 90.0000          | 90.0000          | 90.0000          |
| $\beta$ (°)          | 90.0000          | 90.0000          | 90.0000          | 90.0000          |
| $\gamma$ (°)         | 90.0000          | 90.0000          | 90.0000          | 90.0000          |
| R <sub>p</sub> (%)   | 1.83             | 1.61             | 1.91             | 1.63             |
| R <sub>wp</sub> (%)  | 1.55             | 1.35             | 1.62             | 1.38             |
| R <sub>exp</sub> (%) | 1.62             | 1.41             | 1.71             | 1.44             |
| $\chi^2$             | 1.69             | 1.18             | 1.76             | 1.22             |

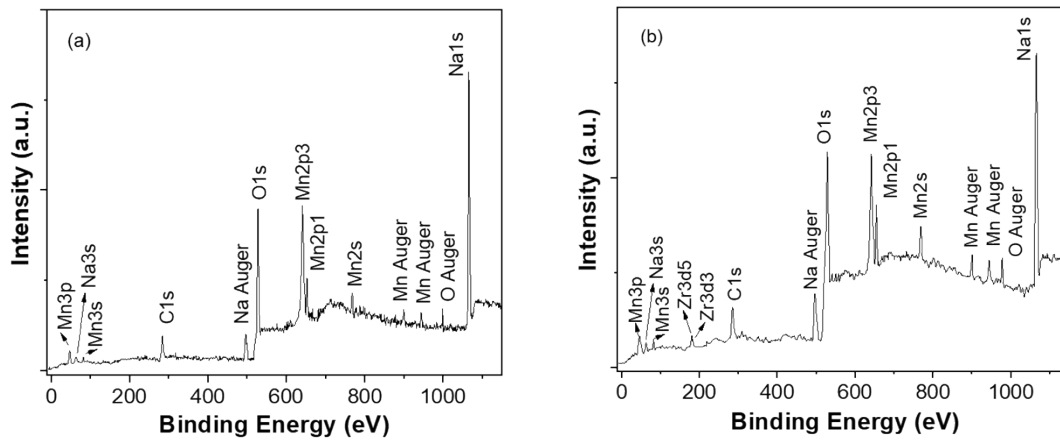

**Figure S1:** XPS survey spectrum of (a)  $\text{Na}_4\text{Mn}_2\text{O}_5$  and (b)  $\text{Na}_4\text{Mn}_{2-x}\text{Zr}_x\text{O}_5$  ( $x=0.1$ ).

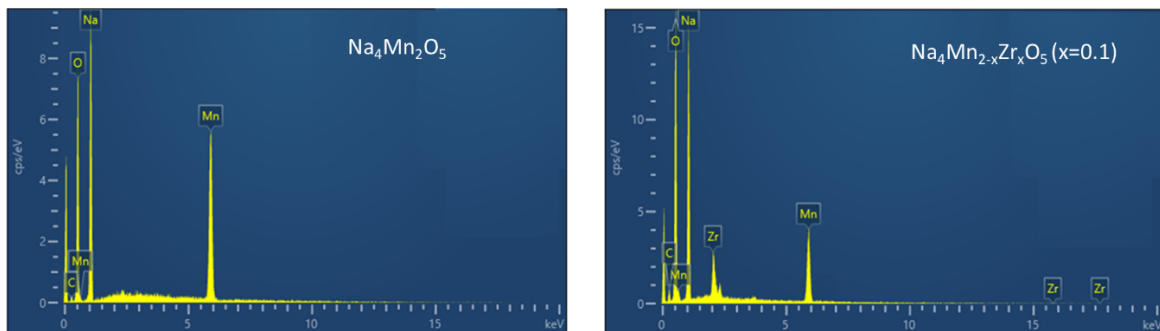

**Figure S2:** EDS plot of  $\text{Na}_4\text{Mn}_2\text{O}_5$  and  $\text{Na}_4\text{Mn}_{2-x}\text{Zr}_x\text{O}_5$  ( $x=0.1$ ).

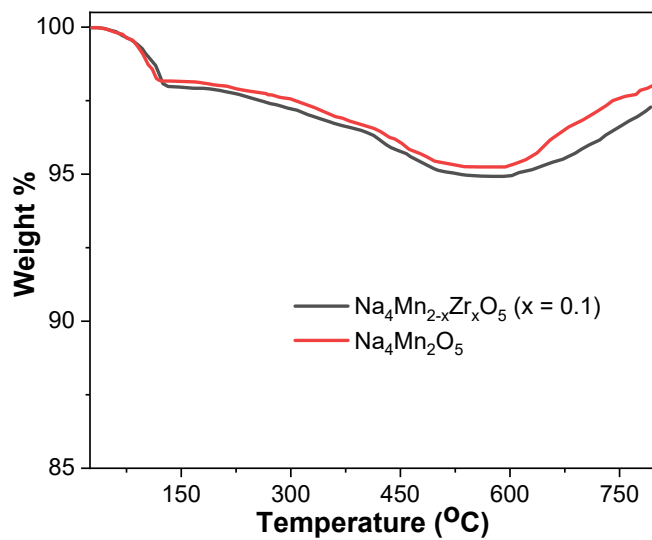

**Figure S3:** TGA plots of  $\text{Na}_4\text{Mn}_2\text{O}_5$  and  $\text{Na}_4\text{Mn}_{2-x}\text{Zr}_x\text{O}_5$  ( $x=0.1$ ).

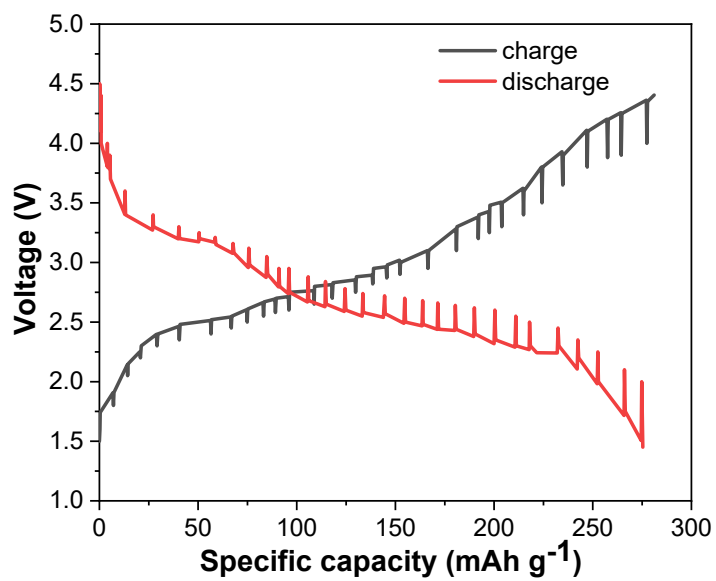

**Figure S4:** GITT plot of  $\text{Na}_4\text{Mn}_{2-x}\text{Zr}_x\text{O}_5$  ( $x=0.1$ ) at current rate of  $15 \text{ mA g}^{-1}$ .

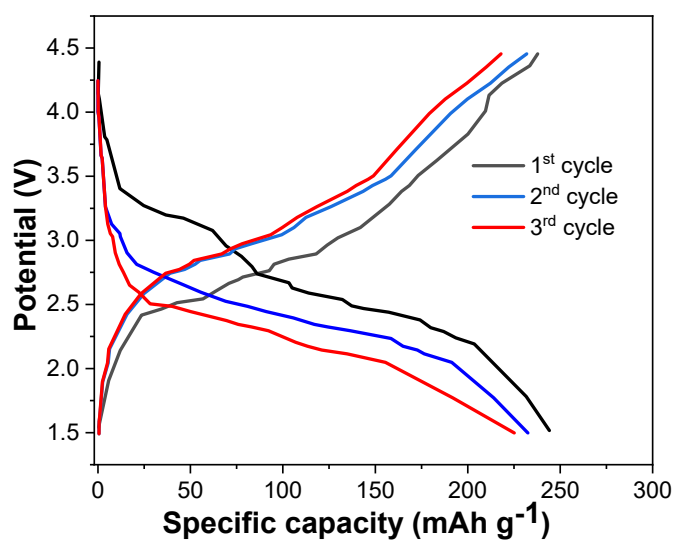

**Figure S5:** GDC plot of  $\text{Na}_4\text{Mn}_2\text{O}_5$

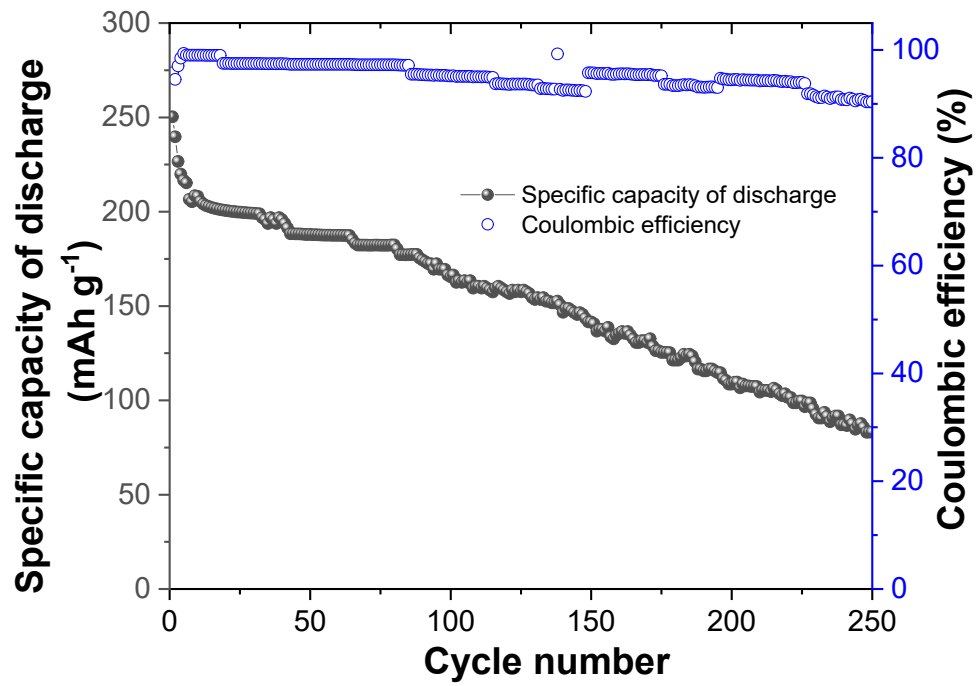

Figure S6: Cycling plot at 0.05 A g<sup>-1</sup> current density of Na<sub>4</sub>Mn<sub>2</sub>O<sub>5</sub>.
